# Supplementary material for: Facile synthesis of CuO micro-sheets over Cu foil in oxalic acid solution and their sensing properties towards n-butanol
Source: Royal Society of Chemistry journal article supplement (doi:10.1039/c5tc02821c), 2015-12-21
Supplement: c5tc02821c1.pdf [file c5tc02821c1.pdf]

Electronic Supplementary Material (ESI) for Journal of Materials Chemistry C.

This journal is © The Royal Society of Chemistry 2015

**Facile synthesis of CuO micro-sheets over peeling off Cu foil in oxalic acid solution and their sensing properties towards n-Butanol**

Chengjun Dong <sup>a,b</sup>, Lihong Wang <sup>a</sup>, Gang Chen <sup>a</sup>, Xuechun Xiao <sup>a,b</sup>, Igor Djerdj <sup>c</sup> and Yude

Wang <sup>\*a,b</sup>

*a School of Physical Science and Technology, Yunnan University, 650091 Kunming, People's Republic of China. Fax: +86-871-65153832; Tel: +86-871-65031124; E-mail: ydwang@ynu.edu.cn*

*b Yunnan Province Key Lab of Mico-Nano Materials and Technology, Yunnan University, 650091 Kunming, People's Republic of China*

*c RuđerBošković Institute, Bijeni čka 54, 10000 Zagreb, Croatia. Fax: +38514680114; Tel: +38514680113; E-mail: igor.djerdj@irb.hr.*

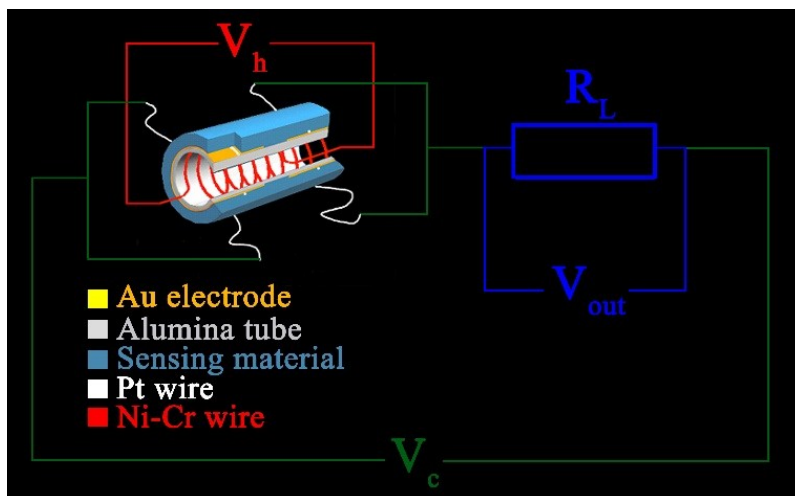

Fig. S1 Schematic structure along with the testing principle of the gas sensor.

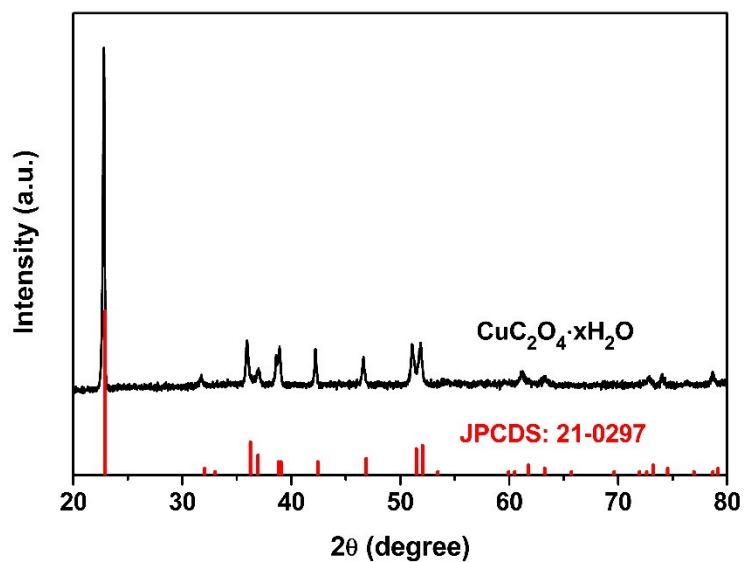

Fig. S2 XRD pattern of  $\text{CuC}_2\text{O}_4 \cdot x\text{H}_2\text{O}$  precursors.

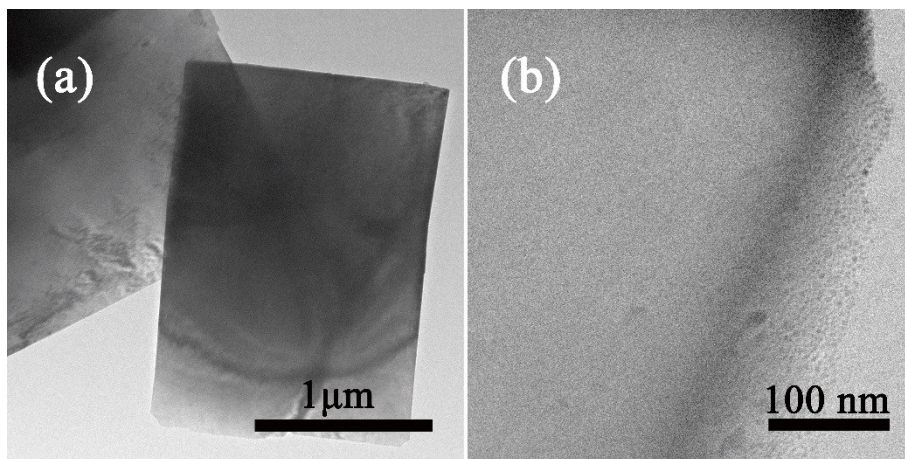

Fig.S3 Typical low- (a) and high-magnification (b) TEM images of  $\text{CuC}_2\text{O}_4 \cdot x\text{H}_2\text{O}$  precursors.

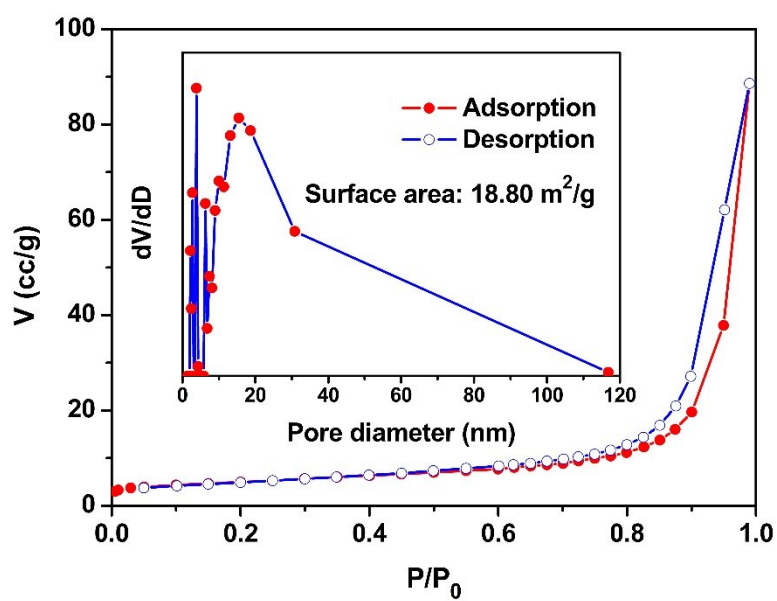

Fig.S4 Nitrogen adsorption–desorption isotherm of the CuO sheets (the inset displays the corresponding pore size distribution obtained from the desorption curve).

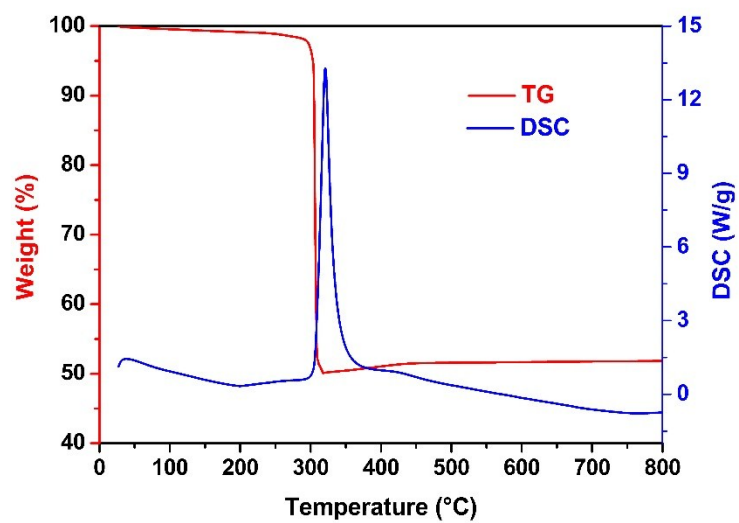

Fig.S5 TG and DSC curves of thermal conversion  $\text{CuC}_2\text{O}_4 \cdot x\text{H}_2\text{O}$  precursor to  $\text{CuO}$ .

Table S1. Rietveld refinement parameters obtained from X-ray diffraction data of CuO using MAUD software package.

---

**Lattice parameters**

Symmetry: Monoclinic

Space group: C2/c

Cell parameters:

a: 4.6865 Å

b: 3.4312 Å

c: 5.1361 Å

$\alpha, \beta, \gamma$  (°): 90, 99.40, 90

Crystallite size (nm): 42.73

**Atomic positions**

Cu:

x: 0.0839

y: 0.2393

z: 0

O:

x: -0.1861

y: 0.4193

z: 0.2249

**Reliability factors**

Rwp (%): 6.60

Rp (%): 5.22

---
